# Supplementary material
Source: PubMed Central journal article supplement (PMC7661076)
Supplement: 20-00165.pdf [file 20-00165.pdf]

**On-line Table: Case comparisons**

|                                               | Controls (n = 229) | IVH (n = 33)        | P                  |
|-----------------------------------------------|--------------------|---------------------|--------------------|
| <b>Demographics</b>                           |                    |                     |                    |
| GA at sonography (mean ± SD)                  | 22.23 ± 1.9        | 22.98 ± 2.3         | .04 <sup>a</sup>   |
| GA at MR imaging (mean ± SD)                  | 22.22 ± 1.9        | 22.98 ± 2.3         | .04 <sup>a</sup>   |
| Diagnosis (MMC), n (%)                        | 179 (78)           | 27 (82)             | .63                |
| Singleton pregnancy, n (%)                    | 226 (99%)          | 32 (97%)            | .42                |
| Sex (female), n (%)                           | 122 (53)           | 18 (55)             | .89                |
| <b>Fetal US findings</b>                      |                    |                     |                    |
| GA (mean ± SD)                                | 21.58 ± 1.94       | 22.68 ± 2.81        | .005 <sup>a</sup>  |
| Biparietal diameter (mean ± SD)               | 4.75 ± 0.59        | 5.16 ± 0.81         | <.001 <sup>a</sup> |
| HC (mean ± SD)                                | 18.40 ± 2.47       | 20.03 ± 3.07        | <.001 <sup>a</sup> |
| HC/AC (mean ± SD)                             | 1.06 ± 0.06        | 1.09 ± 0.06         | <.001 <sup>a</sup> |
| Cerebellum (mean ± SD)                        | 2.19 ± 0.3         | 2.24 ± 0.43         | .48                |
| Third ventricle (mean ± SD)                   | 1.01 ± 0.6         | 1.63 ± 1.01         | .002 <sup>a</sup>  |
| Left ventricle (mean ± SD)                    | 9.59 ± 3.06        | 15.29 ± 5.29        | <.001 <sup>a</sup> |
| Right ventricle (mean ± SD)                   | 8.77 ± 3.11        | 13.57 ± 4.22        | <.001 <sup>a</sup> |
| Ventricle difference (mean ± SD)              | 0.82 ± 2.06        | 1.72 ± 3.69         | .18                |
| <b>Level of osseous defect</b>                |                    |                     |                    |
| T12 or higher, n (%)                          | 12 (5%)            | 4 (12%)             |                    |
| L1–L3, n (%)                                  | 105 (46%)          | 7 (21%)             |                    |
| L4 or lower, n (%)                            | 112 (49%)          | 22 (67%)            |                    |
| <b>Fetal MRI findings</b>                     |                    |                     |                    |
| Left ventricle (mean ± SD)                    | 10.62 ± 3.16       | 16.57 ± 5.85        | <.001 <sup>a</sup> |
| Right ventricle (mean ± SD)                   | 10.11 ± 3.09       | 15.14 ± 4.41        | <.001 <sup>a</sup> |
| Ventricle difference (mean ± SD)              | 0.51 ± 1.65        | 1.42 ± 3.62         | .16                |
| HH, n (%)                                     | 182 (79)           | 32 (97)             | .02 <sup>a</sup>   |
| <b>Perinatal findings</b>                     |                    |                     |                    |
| Fetal closure, n (%)                          | 78 (34)            | 8 (24)              | .4                 |
| GA at fetal closure (mean ± SD)               | 23.8 ± 0.99        | 24.64 ± 0.81        | .02 <sup>a</sup>   |
| Live birth, n (%)                             | 161 (75)           | 16 (62)             | .21                |
| GA at birth (mean ± SD)                       | 35.85 ± 2.9        | 35.86 ± 2.44        | .99                |
| <b>Postnatal findings</b>                     |                    |                     |                    |
| Age at MR imaging (days), n, median (IQR)     | 85; 6 (4, 10)      | 8; 4 (2.75, 9.75)   | .5                 |
| Spine surgery, n (%)                          | 35 (37)            | 2 (25)              | .7                 |
| Age at spinal surgery (days), n, median (IQR) | 34; 1 (1, 1)       | 2; 1 (1, 1)         | .8                 |
| Shunt placement, n (%)                        | 41 (37)            | 4 (36)              | 1                  |
| Age at shunt placement (days), median (IQR)   | 11 (7, 21.5)       | 18.5 (15.75, 21.25) | .6                 |
| Postnatal IVH, n (%)                          | 10 (12)            | 5 (63)              | .003 <sup>a</sup>  |
| Persistent HH, n (%)                          | 21 (25)            | 4 (50)              | .2                 |

**Note:**—HC/AC indicates head circumference to abdominal circumference ratio; IQR, interquartile range.

<sup>a</sup> Significant difference  $P < .05$ .
